# Supplementary material for: Identification and Expression Analysis of Wheat TaGF14 Genes
Source: PubMed Central journal article supplement (PMC5797578; doi:10.3389/fgene.2018.00012), 2018-01-30
Supplement: Table_1.pdf [file Table_1.pdf]

**Supplementary Table S1.** The CDS of 14-3-3 genes and their deduced proteins in 8 representative species

| Lineage  | Organism                       | Nomenclature   | Locus name                 | Chr.    | Subgroup | CDS Length | Protein Length |
|----------|--------------------------------|----------------|----------------------------|---------|----------|------------|----------------|
| Monocots | <i>Brachypodium distachyon</i> | <i>BdGF14a</i> | <i>Bradi3g38640</i>        | Chr 03  | non-ε    | 789        | 262            |
|          |                                | <i>BdGF14b</i> | <i>Bradi5g12510</i>        | Chr 05  | non-ε    | 789        | 262            |
|          |                                | <i>BdGF14c</i> | <i>Bradi3g36480</i>        | Chr 03  | non-ε    | 771        | 256            |
|          |                                | <i>BdGF14d</i> | <i>Bradi4g16640</i>        | Chr 04  | non-ε    | 789        | 266            |
|          |                                | <i>BdGF14e</i> | <i>Bradi3g46960</i>        | Chr 03  | non-ε    | 801        | 262            |
|          |                                | <i>BdGF14f</i> | <i>Bradi1g11290</i>        | Chr 01  | non-ε    | 792        | 263            |
|          |                                | <i>BdGF14g</i> | <i>Bradi4g13970</i>        | Chr 04  | ε        | 897        | 298            |
|          | <i>Oryza sativa</i>            | <i>OsGF14a</i> | <i>Os08g37490</i>          | Chr 08  | non-ε    | 795        | 246            |
|          |                                | <i>OsGF14b</i> | <i>Os04g38870</i>          | Chr 04  | non-ε    | 789        | 262            |
|          |                                | <i>OsGF14c</i> | <i>Os08g33370</i>          | Chr 08  | non-ε    | 771        | 256            |
|          |                                | <i>OsGF14d</i> | <i>Os11g34450</i>          | Chr 11  | non-ε    | 798        | 265            |
|          |                                | <i>OsGF14e</i> | <i>Os02g36974</i>          | Chr 02  | non-ε    | 789        | 262            |
|          |                                | <i>OsGF14f</i> | <i>Os03g50290</i>          | Chr 03  | non-ε    | 783        | 260            |
|          |                                | <i>OsGF14g</i> | <i>Os01g11110</i>          | Chr 01  | ε        | 612        | 203            |
|          |                                | <i>OsGF14h</i> | <i>Os11g39540</i>          | Chr 11  | ε        | 693        | 230            |
|          | <i>Triticum aestivum</i>       | <i>TaGF14a</i> | <i>Traes_2AL_197BC062C</i> | Chr 2AL | non-ε    | 792        | 263            |
|          |                                | <i>TaGF14b</i> | <i>Traes_3AS_8A727B48F</i> | Chr 3AS | non-ε    | 789        | 262            |
|          |                                | <i>TaGF14c</i> | <i>Traes_4AS_2FF2E3CAF</i> | Chr 4AS | non-ε    | 801        | 266            |
|          |                                | <i>TaGF14d</i> | <i>Traes_4AL_6B5C89E7C</i> | Chr 4AL | non-ε    | 786        | 261            |
|          |                                | <i>TaGF14e</i> | <i>Traes_2BL_1B2A85367</i> | Chr 2BL | non-ε    | 792        | 263            |
|          |                                | <i>TaGF14f</i> | <i>Traes_4DL_9C6C9CB1A</i> | Chr 4DL | -        | -          | -              |
|          |                                | <i>TaGF14g</i> | <i>Traes_4BS_342A62CE6</i> | Chr 4BS | non-ε    | 801        | 266            |
|          |                                | <i>TaGF14h</i> | <i>Traes_4BS_F7F9DE1D4</i> | Chr 4BS | non-ε    | 786        | 261            |
|          |                                | <i>TaGF14i</i> | <i>Traes_4BS_D9C942644</i> | Chr 4BS | ε        | 750        | 249            |
|          |                                | <i>TaGF14j</i> | <i>Traes_4DS_8D47B4C37</i> | Chr 4DS | non-ε    | 786        | 261            |

|  |                 |                |                                              |         |       |      |     |
|--|-----------------|----------------|----------------------------------------------|---------|-------|------|-----|
|  |                 | <i>TaGF14k</i> | <i>Traes_2DL_1D9<br/>12517E</i>              | Chr 2DL | non-ε | 552  | 183 |
|  |                 | <i>TaGF14l</i> | <i>Traes_3B_3BF0<br/>24700350CFD_c<br/>1</i> | Chr 3BS | non-ε | 789  | 262 |
|  |                 | <i>TaGF14m</i> | <i>Traes_3DS_634<br/>71506E</i>              | Chr 3DS | non-ε | 792  | 263 |
|  |                 | <i>TaGF14n</i> | <i>Traes_4DL_BC<br/>CE5731E</i>              | Chr 4DL | non-ε | 801  | 266 |
|  |                 | <i>TaGF14o</i> | <i>Traes_7AL_AA8<br/>1EE544</i>              | Chr 7AL | non-ε | 693  | 230 |
|  |                 | <i>TaGF14p</i> | <i>Traes_7BS_C7A<br/>3E1534</i>              | Chr 7BS | non-ε | 576  | 191 |
|  |                 | <i>TaGF14q</i> | <i>Traes_7DL_739<br/>28596C</i>              | Chr 7DL | non-ε | 549  | 182 |
|  |                 | <i>TaGF14r</i> | <i>Traes_2DL_216<br/>39EB55</i>              | Chr 2DL | non-ε | 327  | 108 |
|  |                 | <i>TaGF14s</i> | <i>Traes_3DS_CD<br/>C0F6925</i>              | Chr 3DS | non-ε | 324  | 107 |
|  |                 | <i>TaGF14t</i> | <i>Traes_7DL_182<br/>87B4F2</i>              | Chr 7DL | non-ε | 285  | 94  |
|  | <i>Zea mays</i> | <i>ZmGF14a</i> | <i>GRMZM2G1024<br/>99</i>                    | Chr 02  | non-ε | 837  | 278 |
|  |                 | <i>ZmGF14b</i> | <i>GRMZM2G0786<br/>41</i>                    | Chr 10  | non-ε | 786  | 261 |
|  |                 | <i>ZmGF14c</i> | <i>GRMZM2G0911<br/>55</i>                    | Chr 04  | non-ε | 771  | 256 |
|  |                 | <i>ZmGF14d</i> | <i>AC217050.4_FG<br/>006</i>                 | Chr 01  | non-ε | 771  | 256 |
|  |                 | <i>ZmGF14e</i> | <i>GRMZM2G1538<br/>23</i>                    | Chr 01  | non-ε | 774  | 257 |
|  |                 | <i>ZmGF14f</i> | <i>GRMZM2G1077<br/>56</i>                    | Chr 06  | non-ε | 1029 | 342 |
|  |                 | <i>ZmGF14g</i> | <i>GRMZM2G1064<br/>24</i>                    | Chr 04  | non-ε | 807  | 268 |
|  |                 | <i>ZmGF14h</i> | <i>GRMZM2G0062<br/>07</i>                    | Chr 06  | non-ε | 765  | 254 |
|  |                 | <i>ZmGF14i</i> | <i>GRMZM2G4087<br/>68</i>                    | Chr 02  | non-ε | 801  | 266 |
|  |                 | <i>ZmGF14j</i> | <i>GRMZM5G8660</i>                           | Chr 04  | non-ε | 759  | 252 |

|                    |                        |                             |                      |                  |        |       |     |     |
|--------------------|------------------------|-----------------------------|----------------------|------------------|--------|-------|-----|-----|
|                    |                        |                             | 82                   |                  |        |       |     |     |
|                    |                        | <i>ZmGF14k</i>              | <i>GRMZM2G140545</i> | Chr 04           | non-ε  | 780   | 259 |     |
|                    |                        | <i>ZmGF14l</i>              | <i>GRMZM2G145213</i> | Chr 04           | ε      | 747   | 248 |     |
|                    | <i>Hordeum vulgare</i> | <i>HvGF14a</i>              | <i>Hv14-3-3a</i>     | Chr 04           | non-ε  | 786   | 261 |     |
|                    |                        | <i>HvGF14b</i>              | <i>Hv14-3-3b</i>     | Chr 03           | non-ε  | 789   | 262 |     |
|                    |                        | <i>HvGF14c</i>              | <i>Hv14-3-3c</i>     | Chr 02           | non-ε  | 792   | 263 |     |
|                    |                        | <i>HvGF14d</i>              | <i>Hv14-3-3d</i>     | Chr 07           | non-ε  | 780   | 259 |     |
|                    |                        | <i>HvGF14e</i>              | <i>Hv14-3-3e</i>     | Chr 04           | non-ε  | 801   | 266 |     |
|                    | <i>Sorghum bicolor</i> | <i>SbGF14a</i>              | <i>Sb07g029110</i>   | Chr 07           | non-ε  | 780   | 259 |     |
|                    |                        | <i>SbGF14b</i>              | <i>Sb07g020990</i>   | Chr 07           | non-ε  | 771   | 256 |     |
|                    |                        | <i>SbGF14c</i>              | <i>Sb06g019100</i>   | Chr 06           | non-ε  | 786   | 261 |     |
|                    |                        | <i>SbGF14d</i>              | <i>Sb05g024160</i>   | Chr 05           | ε      | 744   | 247 |     |
|                    |                        | <i>SbGF14e</i>              | <i>Sb07g025680</i>   | Chr 07           | non-ε  | 762   | 253 |     |
|                    |                        | <i>SbGF14f</i>              | <i>Sb05g021020</i>   | Chr 05           | non-ε  | 798   | 265 |     |
|                    | Dicots                 | <i>Arabidopsis thaliana</i> | <i>GRF1</i>          | <i>AT4G09000</i> | Chr 04 | non-ε | 957 | 318 |
|                    |                        |                             | <i>GRF2</i>          | <i>AT1G78300</i> | Chr 01 | non-ε | 780 | 259 |
|                    |                        |                             | <i>GRF3</i>          | <i>AT5G38480</i> | Chr 05 | non-ε | 768 | 255 |
|                    |                        |                             | <i>GRF4</i>          | <i>AT1G35160</i> | Chr 01 | non-ε | 888 | 295 |
| <i>GRF5</i>        |                        |                             | <i>AT5G16050</i>     | Chr 05           | non-ε  | 807   | 268 |     |
| <i>GRF6</i>        |                        |                             | <i>AT5G10450</i>     | Chr 05           | non-ε  | 798   | 273 |     |
| <i>GRF7</i>        |                        |                             | <i>AT3G02520</i>     | Chr 03           | non-ε  | 822   | 265 |     |
| <i>GRF8</i>        |                        |                             | <i>AT5G65430</i>     | Chr 05           | non-ε  | 783   | 260 |     |
| <i>GRF9</i>        |                        |                             | <i>AT2G42590</i>     | Chr 02           | ε      | 831   | 276 |     |
| <i>GRF10</i>       |                        |                             | <i>AT1G22300</i>     | Chr 01           | ε      | 765   | 254 |     |
| <i>GRF11</i>       |                        |                             | <i>AT1G34760</i>     | Chr 01           | ε      | 768   | 255 |     |
| <i>GRF12</i>       |                        |                             | <i>AT1G26480</i>     | Chr 01           | ε      | 807   | 268 |     |
| <i>GRF13</i>       |                        |                             | <i>AT1G78220</i>     | Chr 01           | ε      | 738   | 245 |     |
| <i>Glycine max</i> |                        | <i>GmGF14a</i>              | <i>Glyma08g47900</i> | Chr 08           | non-ε  | 783   | 260 |     |
|                    |                        | <i>GmGF14b</i>              | <i>Glyma04g09820</i> | Chr 04           | non-ε  | 753   | 250 |     |
|                    |                        | <i>GmGF14c</i>              | <i>Glyma05g29080</i> | Chr 05           | ε      | 780   | 259 |     |
|                    |                        | <i>GmGF14d</i>              | <i>Glyma13g36690</i> | Chr 13           | ε      | 786   | 261 |     |
|                    |                        | <i>GmGF14e</i>              | <i>Glyma01g07070</i> | Chr 01           | ε      | 780   | 259 |     |
|                    | <i>GmGF14f</i>         | <i>Glyma02g12930</i>        | Chr 02               | ε                | 780    | 259   |     |     |
|                    | <i>GmGF14g</i>         | <i>Glyma02g37120</i>        | Chr 02               | non-ε            | 789    | 262   |     |     |
| <i>GmGF14h</i>     | <i>Glyma06g10650</i>   | Chr 06                      | non-ε                | 840              | 279    |       |     |     |

|  |  |                |                      |        |       |     |     |
|--|--|----------------|----------------------|--------|-------|-----|-----|
|  |  | <i>GmGF14i</i> | <i>Glyma04g10820</i> | Chr 04 | non-ε | 867 | 288 |
|  |  | <i>GmGF14j</i> | <i>Glyma06g09890</i> | Chr 06 | non-ε | 753 | 250 |
|  |  | <i>GmGF14k</i> | <i>Glyma14g35410</i> | Chr 14 | non-ε | 945 | 314 |
|  |  | <i>GmGF14l</i> | <i>Glyma08g12220</i> | Chr 08 | ε     | 780 | 259 |
|  |  | <i>GmGF14m</i> | <i>Glyma18g53610</i> | Chr 18 | non-ε | 774 | 257 |
|  |  | <i>GmGF14n</i> | <i>Glyma12g35820</i> | Chr 12 | ε     | 798 | 265 |
|  |  | <i>GmGF14o</i> | <i>Glyma12g33800</i> | Chr 12 | ε     | 786 | 261 |
|  |  | <i>GmGF14p</i> | <i>Glyma13g34580</i> | Chr 13 | ε     | 792 | 263 |
|  |  | <i>GmGF14q</i> | <i>Glyma07g35240</i> | Chr 07 | ε     | 780 | 259 |
|  |  | <i>GmGF14r</i> | <i>Glyma20g03120</i> | Chr 20 | ε     | 783 | 260 |
