# Supplementary material for: Identification and Expression Analysis of Wheat TaGF14 Genes
Source: PubMed Central journal article supplement (PMC5797578; doi:10.3389/fgene.2018.00012), 2018-01-30
Supplement: Table_2.pdf [file Table_2.pdf]

**Supplementary Table S2. Predicted prosites of the predicted structure of the 14-3-3 protein from developing wheat endosperms according to the ProtParam tool.**

| Prosite                                                       | Pattern                                                | Location and sequence                                                                                                                                                                                                                              |
|---------------------------------------------------------------|--------------------------------------------------------|----------------------------------------------------------------------------------------------------------------------------------------------------------------------------------------------------------------------------------------------------|
| N-glycosylation site                                          | N <sup>[^P]</sup> [ST] <sup>[^P]</sup>                 | <sup>182</sup> NFSV; <sup>233</sup> NLTL                                                                                                                                                                                                           |
| cAMP- and cGMP- dependent protein kinase phosphorylation site | [RK]{2}.[ST]                                           | <sup>62</sup> RRAS                                                                                                                                                                                                                                 |
| Protein kinase C phosphorylation site                         | [ST].[RK]                                              | <sup>65</sup> SWR; <sup>87</sup> SIK; <sup>219</sup> SYK                                                                                                                                                                                           |
| Casein kinase II phosphorylation site                         | [ST].{2}[DE]                                           | <sup>2</sup> STAE; <sup>7</sup> TREE; <sup>44</sup> TVEE; <sup>70</sup> SSIE; <sup>87</sup> SIKE; <sup>93</sup> SRIE; <sup>119</sup> TAAE; <sup>143</sup> SGAE; <sup>160</sup> SAQD; <sup>214</sup> TLGE; <sup>219</sup> SYKD; <sup>254</sup> SKPE |
| Tyrosine kinase phosphorylation site                          | [RK].{2,3}[DE].{2,3}Y                                  | <sup>129</sup> KMKGDYHRY                                                                                                                                                                                                                           |
| N-myristoylation site                                         | G <sup>[^E]</sup> DRKHPFYW.{2}[STAGCN] <sup>[^P]</sup> | <sup>60</sup> GARRAS; <sup>178</sup> GLALNF                                                                                                                                                                                                        |
| 14-3-3 proteins signature 1                                   | [RA]NL[LIV]S[VG][GA]Y[KN]N[IVA]                        | <sup>48</sup> RNLLSVAYKNV                                                                                                                                                                                                                          |
| 14-3-3 proteins signature 2                                   | YK[DE][SG]TLI[IML]QL[L F][RHC]DN[LF]T[LS]W[TA NS][SAD] | <sup>220</sup> YKDSTLIMQLLRDNLTLWTS                                                                                                                                                                                                                |
