# Supplementary material for: Identification and Expression Analysis of Wheat TaGF14 Genes
Source: PubMed Central journal article supplement (PMC5797578; doi:10.3389/fgene.2018.00012), 2018-01-30
Supplement: Table_3.pdf [file Table_3.pdf]

**Supplementary Table S3. The primers used in this study.**

| Primer    | Primer sequence (5'-3')                       |
|-----------|-----------------------------------------------|
| UPM_long  | CTAATACGACTCACTATAGGGCAAGCAGTGGTATCAACGCAGAGT |
| UPM_short | CTAATACGACTCACTATAGGGC                        |
| NUP       | AAGCAGTGGTAACAACGCAGAGT                       |
| GSP1      | TAAGGAGCGGCTCCCTCAGGTCGAG                     |
| GSP2      | ACCTT/CGTCCCCTCTGCCACTGCTGCA                  |
| BamHI F   | CCAGAGGAAAGGATCCGAACTAGTT                     |
| HindIII R | GCC <u>AAGCTT</u> TGCCCTCTCCCTCAG             |
